# Supplementary material for: COVID-19 hinterland: surveilling the self-reported impacts of the pandemic on diabetes management in the USA (cross-sectional results of the iNPHORM study)
Source: PubMed Central journal article supplement — BMJ Open. 2021 Sep 2;11(9):e049782. doi: 10.1136/bmjopen-2021-049782 (PMC8413474; doi:10.1136/bmjopen-2021-049782), 2021-09-02
Supplement: bmjopen-2021-049782supp001.pdf [file bmjopen-2021-049782supp001.pdf]

Appendix A. Items assessing the impact of the COVID-19 situation on aspects of diabetes management

On a scale from *much harder* to *much easier*, please tell us how the Coronavirus (COVID-19) situation has impacted the following aspects of your life.

In general, **since the last time I completed an iNPHORM survey...**

|                                                                       | ...has been much harder  | ...has been somewhat harder | ...has <b>not</b> been impacted | ... has been somewhat easier | ...has been much easier  |
|-----------------------------------------------------------------------|--------------------------|-----------------------------|---------------------------------|------------------------------|--------------------------|
| 1. ...Affording my rent and other living expenses                     | <input type="checkbox"/> | <input type="checkbox"/>    | <input type="checkbox"/>        | <input type="checkbox"/>     | <input type="checkbox"/> |
| 2. ...Affording my diabetes medication(s)                             | <input type="checkbox"/> | <input type="checkbox"/>    | <input type="checkbox"/>        | <input type="checkbox"/>     | <input type="checkbox"/> |
| 3. ...Affording my test strips and/or sensors                         | <input type="checkbox"/> | <input type="checkbox"/>    | <input type="checkbox"/>        | <input type="checkbox"/>     | <input type="checkbox"/> |
| 4. ...Getting my diabetes medication(s) from the pharmacy             | <input type="checkbox"/> | <input type="checkbox"/>    | <input type="checkbox"/>        | <input type="checkbox"/>     | <input type="checkbox"/> |
| 5. ...Making sure I have enough food to avoid hypoglycemia            | <input type="checkbox"/> | <input type="checkbox"/>    | <input type="checkbox"/>        | <input type="checkbox"/>     | <input type="checkbox"/> |
| 6. ...Testing/monitoring my blood glucose                             | <input type="checkbox"/> | <input type="checkbox"/>    | <input type="checkbox"/>        | <input type="checkbox"/>     | <input type="checkbox"/> |
| 7. ...Staying as physically active as I usually am                    | <input type="checkbox"/> | <input type="checkbox"/>    | <input type="checkbox"/>        | <input type="checkbox"/>     | <input type="checkbox"/> |
| 8. ...Consulting with my healthcare provider(s) about my diabetes     | <input type="checkbox"/> | <input type="checkbox"/>    | <input type="checkbox"/>        | <input type="checkbox"/>     | <input type="checkbox"/> |
| 9. ...Remembering to take my diabetes medication(s) as prescribed     | <input type="checkbox"/> | <input type="checkbox"/>    | <input type="checkbox"/>        | <input type="checkbox"/>     | <input type="checkbox"/> |
| 10. ...Monitoring my risk of hypoglycemia regularly                   | <input type="checkbox"/> | <input type="checkbox"/>    | <input type="checkbox"/>        | <input type="checkbox"/>     | <input type="checkbox"/> |
| 11. ...Having enough social support to help me manage my hypoglycemia | <input type="checkbox"/> | <input type="checkbox"/>    | <input type="checkbox"/>        | <input type="checkbox"/>     | <input type="checkbox"/> |
| 12. ...Feeling in control of my hypoglycemia                          | <input type="checkbox"/> | <input type="checkbox"/>    | <input type="checkbox"/>        | <input type="checkbox"/>     | <input type="checkbox"/> |

When answering this next question, please think about the time **since you last completed an iNPHORM survey.**

**Because of the Coronavirus (COVID-19) situation,** did you ever **cut back** on your diabetes medication(s) in order to...

|                                                             | Yes                      | No                       |
|-------------------------------------------------------------|--------------------------|--------------------------|
| 13. ...make your diabetes medication(s) supply last longer? | <input type="checkbox"/> | <input type="checkbox"/> |
| 14. ...avoid hypoglycemia?                                  | <input type="checkbox"/> | <input type="checkbox"/> |
